# Supplementary material for: Development of methods for Mg, Sr and Pb isotopic analysis of crude oil by MC-ICP-MS: addressing the challenges of sample decomposition
Source: Royal Society of Chemistry journal article supplement (doi:10.1039/d1ja00120e), 2021-01-01
Supplement: d1ja00120e1.pdf [file d1ja00120e1.pdf]

## Electronic Supplementary Information (ESI)

### **Development of Methods for Mg, Sr and Pb Isotopic Analysis of Crude Oil by MC-ICP-MS: Addressing the Challenges of Sample Decomposition**

*Alessandra S. Henn<sup>a</sup>, Stepan M. Chernonozhkin<sup>b</sup>, Frank Vanhaecke<sup>b</sup>, Erico M. M. Flores<sup>a\*</sup>*

*<sup>a</sup> Departamento de Química, Universidade Federal de Santa Maria, 97105-900, Santa Maria, RS, Brazil*

*<sup>b</sup> Atomic and Mass Spectrometry – A&MS research unit, Department of Chemistry, Ghent University, Campus Sterre, Krijgslaan 281-S12, 9000, Ghent, Belgium.*

\*Corresponding author: Tel: +55 55 3220 9445

Email address (Erico M. M. Flores): [ericommf@gmail.com](mailto:ericommf@gmail.com)

**Table S1.** Instrument settings and data acquisition parameters for the Thermo Scientific Neptune MC-ICP-MS instrument.

| Instrument settings                                      |                          |                          |                                                                         |                         |                          |                          |                                    |
|----------------------------------------------------------|--------------------------|--------------------------|-------------------------------------------------------------------------|-------------------------|--------------------------|--------------------------|------------------------------------|
|                                                          | Mg                       |                          | Sr                                                                      |                         | Pb                       |                          |                                    |
| RF power, W                                              |                          |                          | 1200                                                                    |                         |                          |                          |                                    |
| Cool gas, L min <sup>-1</sup>                            |                          |                          | 15                                                                      |                         |                          |                          |                                    |
| Auxiliary gas, L min <sup>-1</sup>                       |                          |                          | 0.6-0.8 <sup>a</sup>                                                    |                         |                          |                          |                                    |
| Nebulizer gas, L min <sup>-1</sup>                       |                          |                          | 0.9-1.1 <sup>a</sup>                                                    |                         |                          |                          |                                    |
| Sampling cone                                            |                          |                          | Ni, Jet-type: 1.1 mm orifice diameter                                   |                         |                          |                          |                                    |
| Skimmer cone                                             |                          |                          | Ni, X-type: 0.8 mm orifice diameter                                     |                         |                          |                          |                                    |
| Sample uptake, mL min <sup>-1</sup>                      |                          |                          | 0.1                                                                     |                         |                          |                          |                                    |
| Mass resolution mode                                     | Medium <sup>b</sup>      |                          | Low                                                                     |                         |                          |                          | Low                                |
| Data acquisition parameters                              |                          |                          |                                                                         |                         |                          |                          |                                    |
| Mode                                                     | Static, multi-collection |                          |                                                                         |                         |                          |                          |                                    |
| Integration time, s                                      |                          |                          | 4.194                                                                   |                         |                          |                          |                                    |
| Number of integrations/blocks/cycles                     | 3/10/5                   |                          | 1/6/5                                                                   |                         |                          |                          | 1/7/6                              |
| Approach for instrumental mass discrimination correction | SSB                      |                          | Russell's law using <sup>88</sup> Sr/ <sup>86</sup> Sr = 8.375209 + SSB |                         |                          |                          | Baxter's correction using Tl + SSB |
| Cup configurations                                       |                          |                          |                                                                         |                         |                          |                          |                                    |
| Mg cup configuration                                     | L3:<br><sup>24</sup> Mg  | C:<br><sup>25</sup> Mg   | H3:<br><sup>26</sup> Mg                                                 |                         |                          |                          |                                    |
| Amplifier, Ω                                             | 10 <sup>11</sup>         | 10 <sup>11</sup>         | 10 <sup>11</sup>                                                        |                         |                          |                          |                                    |
| Sr cup configuration                                     | L4:<br><sup>82</sup> Kr  | L3:<br><sup>83</sup> Kr  | L2:<br><sup>84</sup> Sr                                                 | L1:<br><sup>85</sup> Rb | C:<br><sup>86</sup> Sr   | H1:<br><sup>87</sup> Sr  | H2:<br><sup>88</sup> Sr            |
| Amplifier, Ω                                             | 10 <sup>11</sup>         | 10 <sup>11</sup>         | 10 <sup>11</sup>                                                        | 10 <sup>11</sup>        | 10 <sup>11</sup>         | 10 <sup>11</sup>         | 10 <sup>11</sup>                   |
| Pb cup configuration                                     | L3:<br><sup>202</sup> Hg | L2:<br><sup>203</sup> Tl | L1:<br><sup>204</sup> Pb                                                | C:<br><sup>205</sup> Tl | H1:<br><sup>206</sup> Pb | H2:<br><sup>207</sup> Pb | H3:<br><sup>208</sup> Pb           |
| Amplifier, Ω                                             | 10 <sup>13</sup>         | 10 <sup>11</sup>         | 10 <sup>13</sup>                                                        | 10 <sup>11</sup>        | 10 <sup>11</sup>         | 10 <sup>11</sup>         | 10 <sup>11</sup>                   |

<sup>a</sup> Optimised daily for maximum analyte intensity.

<sup>b</sup> Δm for pseudo-high resolution in MC-ICP-MS is defined as the difference between masses corresponding to 5 and 95 % of the signal intensity at the plateau. A resolving power of 3800 was measured for the medium mass resolution mode. Such a definition exceeds that based on atomic mass difference (10% valley definition) roughly two-fold.<sup>1</sup>

**Table S2.** Summary of sample preparation methods reported in the literature for Sr and Pb isotopic analysis of crude oil.

| Analyte       | Sample preparation and analyte isolation procedure                                                                                                                                                                                                                                                                                                                                                                                                                                                                                                                                                                                                                                                                                                                                                                                                                                                                                                                                                                                                                                                                                                         | Technique    | Ref.      |
|---------------|------------------------------------------------------------------------------------------------------------------------------------------------------------------------------------------------------------------------------------------------------------------------------------------------------------------------------------------------------------------------------------------------------------------------------------------------------------------------------------------------------------------------------------------------------------------------------------------------------------------------------------------------------------------------------------------------------------------------------------------------------------------------------------------------------------------------------------------------------------------------------------------------------------------------------------------------------------------------------------------------------------------------------------------------------------------------------------------------------------------------------------------------------------|--------------|-----------|
| Sr            | 3.5 g of crude oil were digested with a mixture of HNO <sub>3</sub> and H <sub>2</sub> O <sub>2</sub> at 120 to 160 °C. Then, samples were ashed in a muffle furnace at 300 to 350°C for 8 h. Residues were dissolved in 2 mol L <sup>-1</sup> HNO <sub>3</sub> and Sr isolation was performed using Sr-Spec resin. After matrix elution with 7 mol L <sup>-1</sup> HNO <sub>3</sub> , the Sr fraction was eluted using 0.05 mol L <sup>-1</sup> HNO <sub>3</sub> .                                                                                                                                                                                                                                                                                                                                                                                                                                                                                                                                                                                                                                                                                        | TIMS         | 2         |
| Pb            | 5 ml of crude oil were dissolved in dichloromethane and mixed with 1.5 mol L <sup>-1</sup> HBr. After mixing, the aqueous phase (HBr) was separated and collected. After collection, HBr was added again to the organic phase and the extraction repeated. Aqueous phases were evaporated to dryness overnight (110 °C) and residues were digested using a mixture of HNO <sub>3</sub> and H <sub>2</sub> O <sub>2</sub> . Finally, 6 mol L <sup>-1</sup> HCl was added and the samples were evaporated to dryness. Residues were dissolved in 2 mol L <sup>-1</sup> HBr and Pb isolation was performed using AG1-X8 resin. After matrix elution with 2 mol L <sup>-1</sup> HBr, the Pb fraction was eluted using 6 mol L <sup>-1</sup> HCl.                                                                                                                                                                                                                                                                                                                                                                                                               | MC-ICP-MS    | 3, 4      |
| Pb            | 0.5 g of crude oil were digested in a high-pressure asher with a mixture of HNO <sub>3</sub> and H <sub>2</sub> O <sub>2</sub> at 320 °C for 90 min. For some samples it was necessary to digest 4 aliquots of 0.5 g due to the low Pb concentration. The four digests were combined and evaporated to dryness. The residue was dissolved in 2% HNO <sub>3</sub> . For derivatization, samples were mixed with a buffer solution and the pH was adjusted to 4.9. Then, isooctane and 1% NaBEt <sub>4</sub> were added and the mixture was manually shaken for 5 min. The isooctane supernatant was collected for analysis.                                                                                                                                                                                                                                                                                                                                                                                                                                                                                                                                 | GC-MC-ICP-MS | 5         |
| Pb            | Sample preparation was performed as described above for reference 17. After evaporation of the digests, the residues were dissolved in 0.5 mol L <sup>-1</sup> HBr and centrifuged for 20 min at 4000 rpm. Pb isolation was performed using AG1-X8 resin. After matrix elution with 0.5 mol L <sup>-1</sup> HBr and 0.2 mol L <sup>-1</sup> HCl, the Pb fraction was eluted using 6 mol L <sup>-1</sup> HCl.                                                                                                                                                                                                                                                                                                                                                                                                                                                                                                                                                                                                                                                                                                                                               | MC-ICP-MS    | 6         |
| Mg, Sr and Pb | <i>i</i> ) 0.5 g of crude oil were digested by MAWD-PDC using 14.4 mol L <sup>-1</sup> HNO <sub>3</sub> at 250 °C for 75 min.<br><i>ii</i> ) 2 to 10 g of crude oil were solubilized in toluene (at 90 °C) and filtered through a nylon membrane filter. The membrane was washed with hot toluene (at 90 °C), dried in an oven (105 °C) and transferred into a vessel containing ultrapure water for analyte dissolution. After evaporation at 90°C (for both, MAWD-PDC and ASTM procedures) the residues were dissolved as follows: in 0.4 mol L <sup>-1</sup> HCl for Mg isolation or in 7 mol L <sup>-1</sup> HNO <sub>3</sub> for Sr and Pb isolation. Mg isolation was performed using AG50WX8 strong cation exchange resin. After matrix elution with 0.4 mol L <sup>-1</sup> HCl and 0.5 mol L <sup>-1</sup> HCl: 95% acetone (only for digests), the Mg fraction was eluted using 0.8 mol L <sup>-1</sup> HCl. Sr and Pb isolation were performed using a Sr-spec resin. After matrix elution with 7 mol L <sup>-1</sup> HNO <sub>3</sub> , the Sr and Pb fractions were eluted with H <sub>2</sub> O and 8 mol L <sup>-1</sup> HCl, respectively. | MC-ICP-MS    | This work |

**Table S3.** Elemental composition of crude oil D obtained upon MAWD-PDC or solubilization. Results obtained via SF-ICP-MS (mean  $\pm$  standard deviation, n = 3).

| Element | Concentration, $\mu\text{g g}^{-1}$ |                      |
|---------|-------------------------------------|----------------------|
|         | MAWD-PDC                            | Solubilization       |
| Al      | 9.96 $\pm$ 0.70                     | -                    |
| Be      | < 0.005 <sup>a</sup>                | < 0.005 <sup>a</sup> |
| Ca      | 512 $\pm$ 36                        | 506 $\pm$ 20         |
| Fe      | 29.8 $\pm$ 1.8                      | -                    |
| K       | 56.7 $\pm$ 4.0                      | 50.9 $\pm$ 3.7       |
| Mg      | 199 $\pm$ 10                        | 201 $\pm$ 9          |
| Mn      | 3.09 $\pm$ 0.22                     | -                    |
| Na      | 2930 $\pm$ 268                      | 2824 $\pm$ 130       |
| Pb      | 0.193 $\pm$ 0.017                   | -                    |
| Rb      | 0.144 $\pm$ 0.010                   | 0.117 $\pm$ 0.007    |
| Sr      | 20.3 $\pm$ 1.0                      | 19.5 $\pm$ 1.1       |
| Ti      | < 0.05 <sup>a</sup>                 | < 0.05 <sup>a</sup>  |
| Zn      | 1.20 $\pm$ 0.10                     | -                    |

<sup>a</sup> LOQ (10 SD) obtained by SF-ICP-MS

## Reference

1. Vanhaecke, F.; Moens, L. *Anal. Bioanal. Chem.* 2004, 378, 232-240.
2. T. A. Yasnygina, S. V. Rasskazov, M. E. Markova, A. E. Zharov, Y. M. Malykh, E. V. Saranina and N. N. Fefelov, *Russ. J. Pacific Geol.*, 2015, 9, 109-119.
3. N. Fetter, J. Blichert-Toft, P. Télouk and F. Albarède, *Chem. Geol.*, 2019, 511, 112-122.
4. N. Fetter, J. Blichert-Toft, J. Ludden, A. Lepland, J. Sánchez Borque, E. Greenhalgh, B. Garcia, D. Edwards, P. Télouk and F. Albarède, *Earth Planet. Sci. Lett.*, 2019, 525, 115747.
5. G. S. Ortega, C. Pécheyran, S. Bérail and O. F. X. Donard, *Anal. Chem.*, 2012, 84, 7874-7880.
6. G. S. Ortega, C. Pécheyran, S. Bérail and O. F. X. Donard, *J. Anal. At. Spectrom.*, 2012, 27, 1447-1456.
